# Supplementary material for: Well-defined graft copolymers of tert-butyldimethylsilyl methacrylate and poly(dimethylsiloxane) macromonomers synthesized by RAFT polymerization
Source: Royal Society of Chemistry journal article supplement (doi:10.1039/c3py00196b), 2013-01-01
Supplement: c3py00196b.pdf [file c3py00196b.pdf]

### Supporting information for

#### Well-defined grafted copolymers of *tert*-butyldimethylsilyl methacrylate and poly(dimethylsiloxane) macromonomers synthesized by RAFT polymerization

Marlène Lejars,\*<sup>a</sup> André Margailan<sup>a</sup> and Christine Bressy<sup>a</sup>

<sup>a</sup> Université de Toulon, Laboratoire MAPIEM, EA 4323, 83957 La Garde, France. Email: marlene.lejars@univ-tln.fr; Fax: +33 4 94 14 24 48. Tel: +33 4 94 14 22 72.

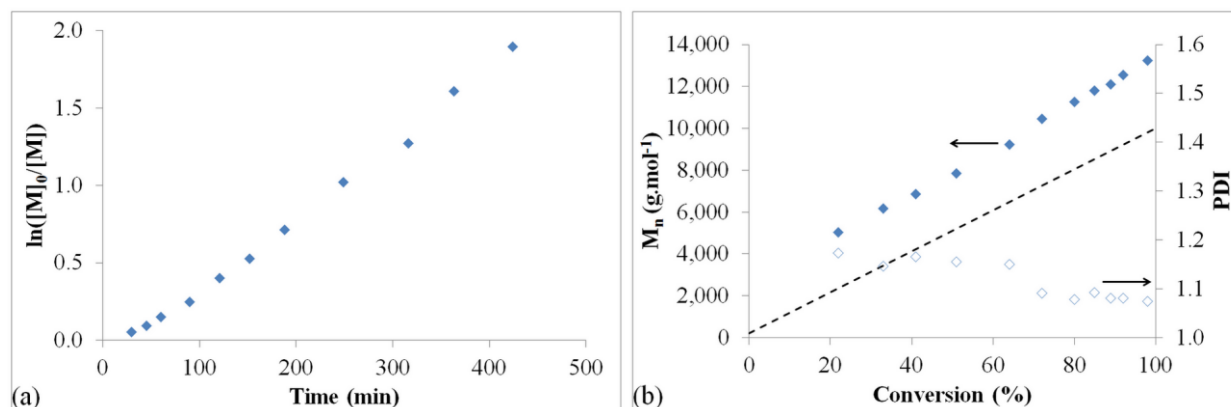

Figure S1: (a) Kinetic plots and (b) evolution of  $M_n$  and PDI versus conversion for the RAFT homopolymerization of TBDMSiMA, in the presence of CPDB, at 70°C, in xylene.

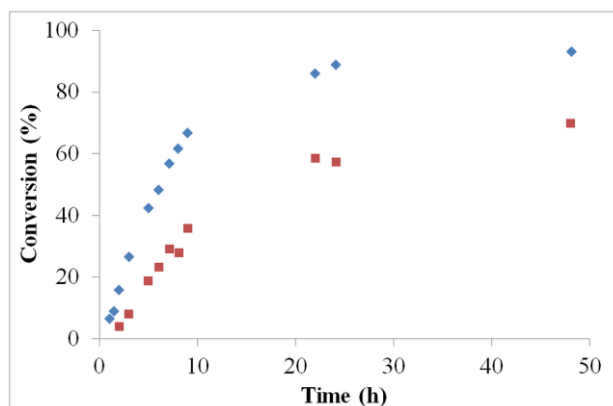

Figure S2: Evolution of the monomer conversion versus time for the RAFT homopolymerization of  $\blacklozenge$  PDMSMA1k and  $\blacksquare$  PDMSMA5k, in the presence of CPDB, at 70°C, in xylene.

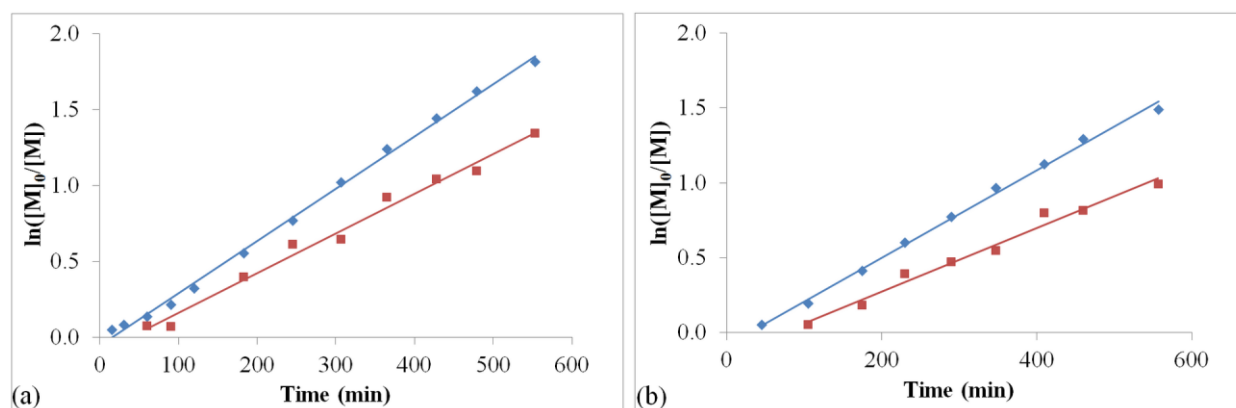

Figure S3: Kinetic plots for the RAFT copolymerization, in the presence of CPDB, at 70°C, in xylene, of (a) ◆ TBDMSiMA and ■ PDMSMA1k, and (b) ◆ TBDMSiMA and ■ PDMSMA5k.

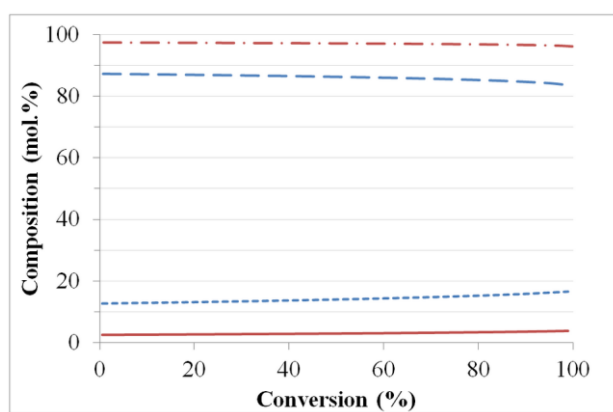

Figure S4: Composition drift of — PDMSMA5k copolymerized with TBDMSiMA, - - PDMSMA1k copolymerized with TBDMSiMA, - · - TBDMSiMA copolymerized with PDMSMA5k, and - - TBDMSiMA copolymerized with PDMSMA1k, calculated from the values of  $r_{\text{TBDMSiMA}}$ , for RAFT copolymerization in the presence of CPDB, at 70°C, in xylene.
